# Supplementary material for: Structure, spectroscopic and electronic properties of a well defined silica supported olefin metathesis catalyst, [(SiO)Re(CR)(CHR)(CH2R)], through DFT periodic calculations: silica is just a large siloxy ligand
Source: Royal Society of Chemistry journal article supplement (doi:10.1039/b603426h), 2006-01-01
Supplement: b603426h.pdf [file b603426h.pdf]

**Table S1.** Relative energies in kcal mol<sup>-1</sup> and selected list of geometry parameters (distances in Å and angles in degrees) using different density functionals for Re(≡CCH<sub>3</sub>)(=CHCH<sub>3</sub>)(CH<sub>2</sub>CH<sub>3</sub>)(OSiH<sub>3</sub>) (**1M<sub>q</sub>**) and Re(≡CCH<sub>3</sub>)(=CHCH<sub>3</sub>)(CH<sub>2</sub>CH<sub>3</sub>)<sub>2</sub> (**2M<sub>q</sub>**) complexes.

| Functional | Structure                                 | $\Delta E$ | Re-C1 | Re-C2 | Re-O  | C2-H  | C1-Re-C2 | Re-C2-H | Re-O-Si |
|------------|-------------------------------------------|------------|-------|-------|-------|-------|----------|---------|---------|
| B3LYP      | <i>syn-1M<sub>q</sub>-G</i> <sup>a</sup>  | 0.0        | 1.728 | 1.873 | 1.928 | 1.110 | 99.3     | 107.2   | 146.6   |
| B3LYP      | <i>anti-1M<sub>q</sub>-G</i> <sup>a</sup> | 1.2        | 1.727 | 1.882 | 1.928 | 1.091 | 98.3     | 127.9   | 145.8   |
| B3LYP      | <i>syn-2M<sub>q</sub>-G</i> <sup>a</sup>  | 0.0        | 1.726 | 1.861 |       | 1.112 | 101.4    | 104.2   |         |
| B3LYP      | <i>anti-2M<sub>q</sub>-G</i> <sup>a</sup> | 2.2        | 1.725 | 1.872 |       | 1.090 | 99.7     | 128.5   |         |
| PBEPBE     | <i>syn-1M<sub>q</sub>-G</i> <sup>a</sup>  | 0.0        | 1.742 | 1.885 | 1.939 | 1.118 | 99.2     | 107.5   | 144.1   |
| PBEPBE     | <i>anti-1M<sub>q</sub>-G</i> <sup>a</sup> | 1.1        | 1.741 | 1.894 | 1.940 | 1.099 | 98.5     | 127.8   | 142.5   |
| PBEPBE     | <i>syn-2M<sub>q</sub>-G</i> <sup>a</sup>  | 0.0        | 1.741 | 1.873 |       | 1.120 | 101.4    | 104.5   |         |
| PBEPBE     | <i>anti-2M<sub>q</sub>-G</i> <sup>a</sup> | 2.1        | 1.740 | 1.884 |       | 1.098 | 100.0    | 128.3   |         |

<sup>a</sup> Calculated as an isolated molecule with GAUSSIAN03 package.

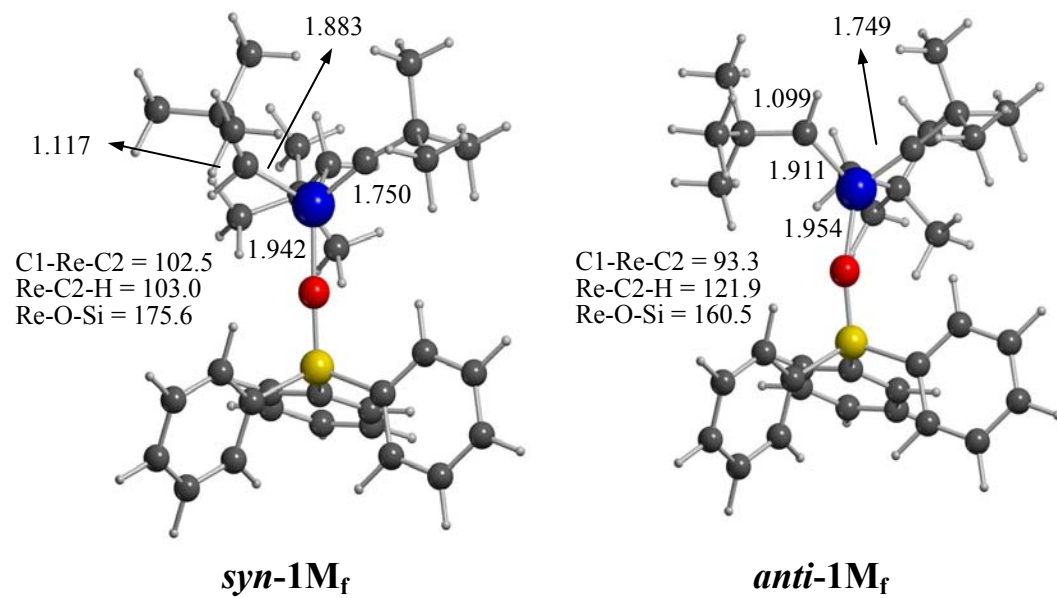

**Figure S1.** Optimized structures of  $\text{Re}(\equiv\text{C}t\text{Bu})(=\text{CH}t\text{Bu})(\text{CH}_2t\text{Bu})(\text{OSiPh}_3)$  (**1M<sub>f</sub>**). Distances in Å and angles in degrees.

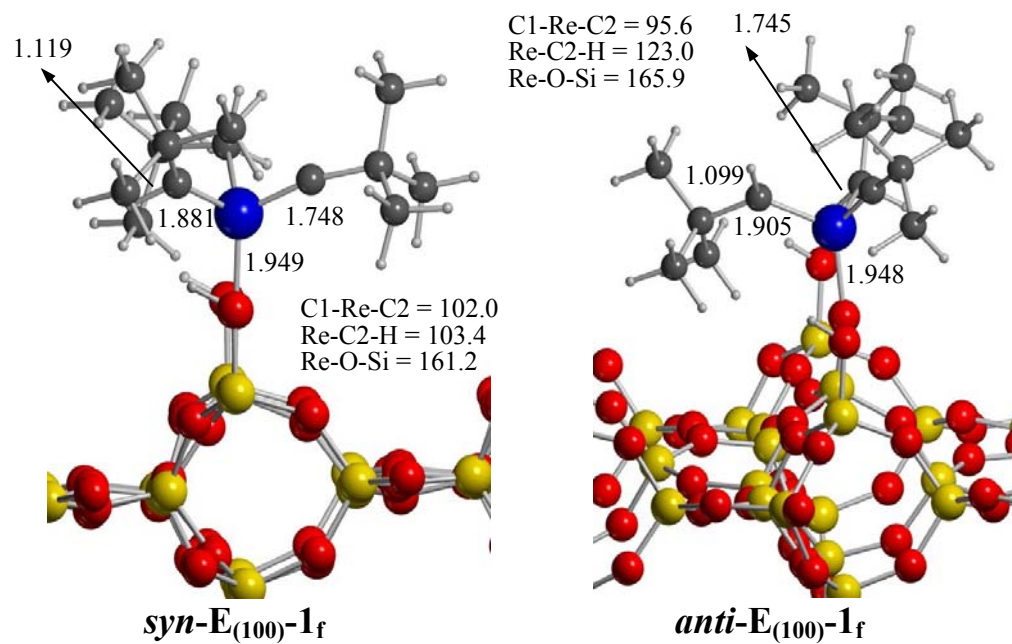

**Figure S2.** Optimized structures of  $[(=SiO)Re(\equiv C tBu)(=CH tBu)(CH_2 tBu)]$  using Edingtonite as surface model ( $E_{(100)}-1_f$ ). Distances in Å and angles in degrees.

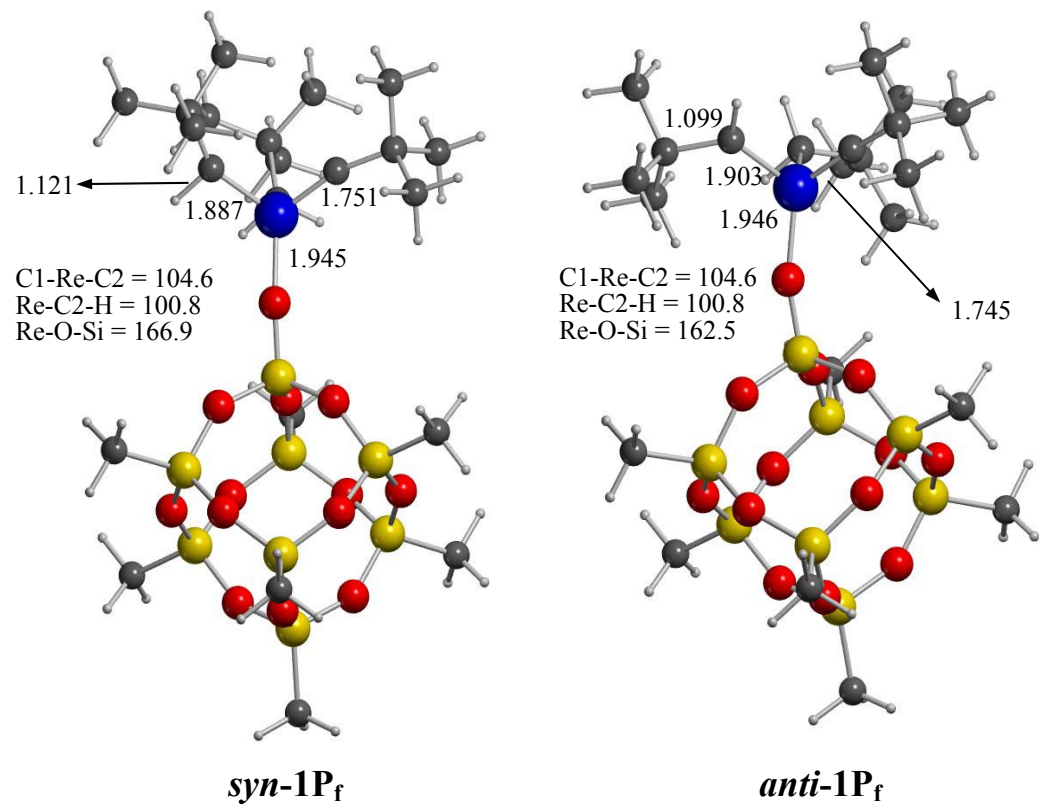

**Figure S3.** Optimized structures of  $[(Me)_7Si_7O_{12}SiO-Re(\equiv C_tBu)(=CH_tBu)(CH_2tBu)]$  (**1P<sub>f</sub>**). Distances in Å and angles in degrees.

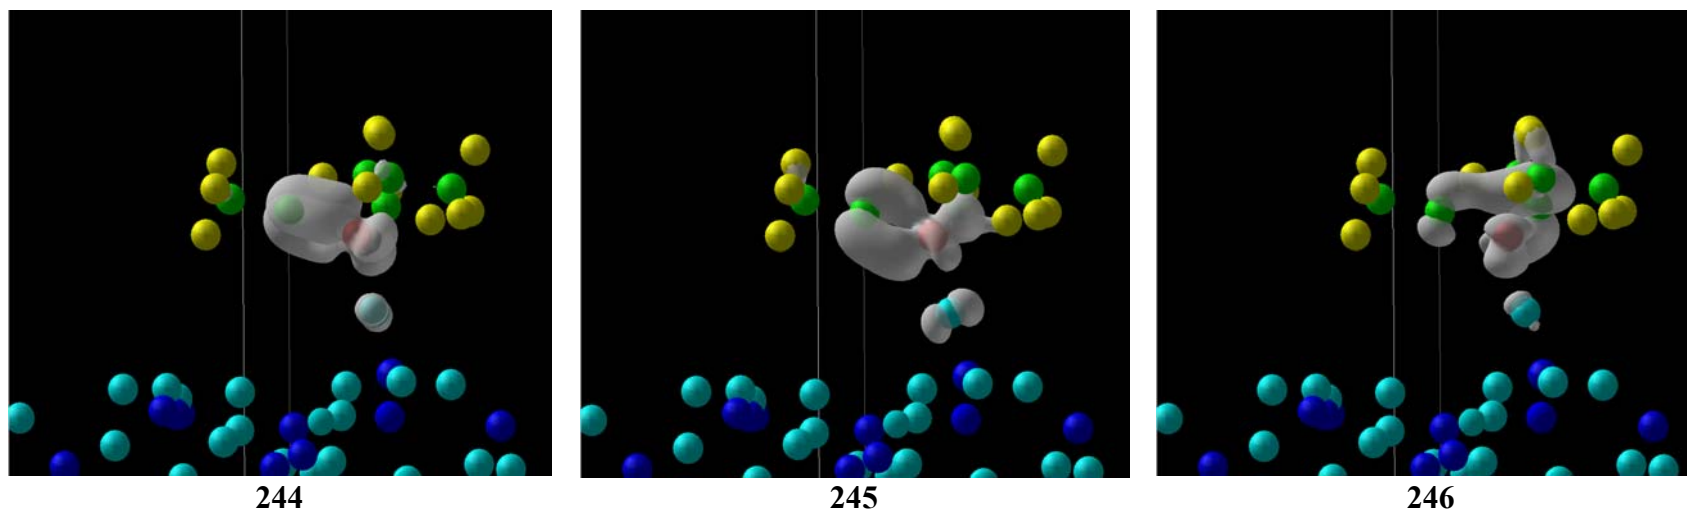

**Figure S4.** Band decomposed charge density for the three highest occupied bands. They correspond to the three  $\pi$  Re-C bonds,  $\text{Re}\equiv\text{C}$  (band number 244 and 245) and  $\text{Re}=\text{C}$  (band number 246). Dark blue atoms = Si, light blue = O, green = C, yellow = H and red = Re.
